# Supplementary material
Source: PubMed Central journal article supplement (PMC4079141)
Supplement: CJP-2014-vol59-May-276-284-eAppendix.pdf [file CJP-2014-vol59-May-276-284-eAppendix.pdf]

Brunault P, Ballon N, Gaillard P, et al. Validation of the French version of the Yale Food Addiction Scale: an examination of its factor structure, reliability, and construct validity in a nonclinical sample. Can J Psychiatry. 2014;59(5):276–284.

## eAppendix. French version of the Yale Food Addiction Scale

**Consignes pour remplir l'échelle:** Ce questionnaire porte sur vos habitudes alimentaires de l'année passée. Les gens ont parfois du mal à maîtriser leur consommation de certains aliments telles que:

- Les aliments sucrés comme la crème glacée, le chocolat, les beignets, les paquets de biscuits, les gâteaux et les bonbons.
- Les féculents comme le pain blanc, les petits pains, les pâtes et le riz.
- Les aliments salés comme les chips, les bretzels et les biscuits.
- Les aliments gras comme le steak, le bacon, les hamburgers, les cheeseburgers, les pizzas et les frites.
- Les boissons sucrées comme le soda.

Pour les questions suivantes qui portent sur « CERTAINS ALIMENTS », pensez à tout aliment équivalent à ceux qui sont énumérés ci-dessus ou d'autres aliments avec lesquels vous avez eu des difficultés au cours de l'année passée.

### Au cours des 12 derniers mois :

|                                                                                                                                                                                                                                                                                                                                          | Jamais                                | Une fois par mois                     | 2 à 4 fois par mois                   | 2 à 4 fois par semaine                | Plus de 4 fois par semaine ou tous les jours |
|------------------------------------------------------------------------------------------------------------------------------------------------------------------------------------------------------------------------------------------------------------------------------------------------------------------------------------------|---------------------------------------|---------------------------------------|---------------------------------------|---------------------------------------|----------------------------------------------|
| 1. Je pense que lorsque je commence à manger certains aliments, je finis par manger beaucoup plus que prévu.                                                                                                                                                                                                                             | <input type="checkbox"/> <sub>0</sub> | <input type="checkbox"/> <sub>1</sub> | <input type="checkbox"/> <sub>2</sub> | <input type="checkbox"/> <sub>3</sub> | <input type="checkbox"/> <sub>4</sub>        |
| 2. Je constate que je continue à manger certains aliments même lorsque je n'ai plus faim.                                                                                                                                                                                                                                                | <input type="checkbox"/> <sub>0</sub> | <input type="checkbox"/> <sub>1</sub> | <input type="checkbox"/> <sub>2</sub> | <input type="checkbox"/> <sub>3</sub> | <input type="checkbox"/> <sub>4</sub>        |
| 3. Je mange jusqu'à me sentir « mal » physiquement.                                                                                                                                                                                                                                                                                      | <input type="checkbox"/> <sub>0</sub> | <input type="checkbox"/> <sub>1</sub> | <input type="checkbox"/> <sub>2</sub> | <input type="checkbox"/> <sub>3</sub> | <input type="checkbox"/> <sub>4</sub>        |
| 4. Le fait d'arrêter de manger certains types d'aliments ou de les réduire, est quelque chose qui me préoccupe.                                                                                                                                                                                                                          | <input type="checkbox"/> <sub>0</sub> | <input type="checkbox"/> <sub>1</sub> | <input type="checkbox"/> <sub>2</sub> | <input type="checkbox"/> <sub>3</sub> | <input type="checkbox"/> <sub>4</sub>        |
| 5. Je passe beaucoup de temps à me sentir endormi(e) ou fatigué(e) après avoir trop mangé.                                                                                                                                                                                                                                               | <input type="checkbox"/> <sub>0</sub> | <input type="checkbox"/> <sub>1</sub> | <input type="checkbox"/> <sub>2</sub> | <input type="checkbox"/> <sub>3</sub> | <input type="checkbox"/> <sub>4</sub>        |
| 6. Je me retrouve fréquemment en train de manger certains aliments tout au long de la journée.                                                                                                                                                                                                                                           | <input type="checkbox"/> <sub>0</sub> | <input type="checkbox"/> <sub>1</sub> | <input type="checkbox"/> <sub>2</sub> | <input type="checkbox"/> <sub>3</sub> | <input type="checkbox"/> <sub>4</sub>        |
| 7. Lorsque certains aliments ne sont pas disponibles, je vais aller les acheter. Par exemple, je ne vais pas hésiter à me rendre dans un magasin pour en acheter alors que j'ai d'autres aliments à la maison.                                                                                                                           | <input type="checkbox"/> <sub>0</sub> | <input type="checkbox"/> <sub>1</sub> | <input type="checkbox"/> <sub>2</sub> | <input type="checkbox"/> <sub>3</sub> | <input type="checkbox"/> <sub>4</sub>        |
| 8. Il m'est arrivé de consommer certains aliments si souvent ou en si grandes quantités que je mangeais au lieu de travailler, au lieu de passer du temps avec ma famille ou mes amis, ou de réaliser des activités importantes ou des activités de loisirs que j'apprécie habituellement.                                               | <input type="checkbox"/> <sub>0</sub> | <input type="checkbox"/> <sub>1</sub> | <input type="checkbox"/> <sub>2</sub> | <input type="checkbox"/> <sub>3</sub> | <input type="checkbox"/> <sub>4</sub>        |
| 9. Il m'est arrivé de consommer certains aliments si souvent ou en si grandes quantités que je passais mon temps à avoir des pensées négatives sur ma consommation excessive, au lieu de passer du temps avec ma famille ou mes amis, ou de réaliser des activités importantes ou des activités de loisir que j'apprécie habituellement. | <input type="checkbox"/> <sub>0</sub> | <input type="checkbox"/> <sub>1</sub> | <input type="checkbox"/> <sub>2</sub> | <input type="checkbox"/> <sub>3</sub> | <input type="checkbox"/> <sub>4</sub>        |
| 10. Il m'est arrivé d'éviter certaines situations professionnelles ou relationnelles au cours desquelles certains aliments étaient disponibles car j'avais peur d'en manger en excès.                                                                                                                                                    | <input type="checkbox"/> <sub>0</sub> | <input type="checkbox"/> <sub>1</sub> | <input type="checkbox"/> <sub>2</sub> | <input type="checkbox"/> <sub>3</sub> | <input type="checkbox"/> <sub>4</sub>        |
| 11. Il m'est arrivé d'éviter certaines situations professionnelles ou relationnelles, car je ne me sentais pas capable d'y consommer certains aliments.                                                                                                                                                                                  | <input type="checkbox"/> <sub>0</sub> | <input type="checkbox"/> <sub>1</sub> | <input type="checkbox"/> <sub>2</sub> | <input type="checkbox"/> <sub>3</sub> | <input type="checkbox"/> <sub>4</sub>        |

|                                                                                                                                                                                                                                                                                                                        |                             |                             |                             |                             |                             |
|------------------------------------------------------------------------------------------------------------------------------------------------------------------------------------------------------------------------------------------------------------------------------------------------------------------------|-----------------------------|-----------------------------|-----------------------------|-----------------------------|-----------------------------|
| 12. J'ai eu des symptômes de sevrage (agitation, anxiété ou autres symptômes physiques) quand j'ai diminué ou arrêté de consommer certains aliments (Merci de ne pas inclure ceux provoqués par l'arrêt de boissons contenant de la caféine comme certains sodas, le café, le thé, les boissons énergisantes, etc...). | <input type="checkbox"/> _0 | <input type="checkbox"/> _1 | <input type="checkbox"/> _2 | <input type="checkbox"/> _3 | <input type="checkbox"/> _4 |
|------------------------------------------------------------------------------------------------------------------------------------------------------------------------------------------------------------------------------------------------------------------------------------------------------------------------|-----------------------------|-----------------------------|-----------------------------|-----------------------------|-----------------------------|

  

|                                                                                                                                                                                                                                                                                            | Jamais                      | Une fois par mois           | 2 à 4 fois par mois         | 2 à 4 fois par semaine      | Plus de 4 fois par semaine ou tous les jours |
|--------------------------------------------------------------------------------------------------------------------------------------------------------------------------------------------------------------------------------------------------------------------------------------------|-----------------------------|-----------------------------|-----------------------------|-----------------------------|----------------------------------------------|
| 13. J'ai consommé certains aliments pour éviter de me sentir anxieux, agité ou de développer d'autres symptômes physiques (Merci de ne pas inclure ceux provoqués par l'arrêt de boissons contenant de la caféine comme certains sodas, le café, le thé, les boissons énergisantes, etc.). | <input type="checkbox"/> _0 | <input type="checkbox"/> _1 | <input type="checkbox"/> _2 | <input type="checkbox"/> _3 | <input type="checkbox"/> _4                  |
| 14. J'ai constaté que j'avais un besoin plus important ou une envie irrésistible de manger certains aliments lorsque j'en diminuais la consommation ou lorsque j'arrêtais d'en manger.                                                                                                     | <input type="checkbox"/> _0 | <input type="checkbox"/> _1 | <input type="checkbox"/> _2 | <input type="checkbox"/> _3 | <input type="checkbox"/> _4                  |
| 15. Mon comportement vis-à-vis la nourriture et de l'alimentation est source d'une souffrance marquée.                                                                                                                                                                                     | <input type="checkbox"/> _0 | <input type="checkbox"/> _1 | <input type="checkbox"/> _2 | <input type="checkbox"/> _3 | <input type="checkbox"/> _4                  |
| 16. Je rencontre des difficultés importantes pour mener à bien mes activités (pour les tâches quotidiennes, le travail / l'école, les activités sociales, les activités familiales, problèmes de santé) à cause de la nourriture et de l'alimentation.                                     | <input type="checkbox"/> _0 | <input type="checkbox"/> _1 | <input type="checkbox"/> _2 | <input type="checkbox"/> _3 | <input type="checkbox"/> _4                  |

**Au cours de ces 12 derniers mois :**

|                                                                                                                                                                                              | Non                         | Oui                         |
|----------------------------------------------------------------------------------------------------------------------------------------------------------------------------------------------|-----------------------------|-----------------------------|
| 17. Ma consommation de nourriture a provoqué d'importants problèmes psychologiques comme de la dépression, de l'anxiété, un dégoût de moi-même ou de la culpabilité.                         | <input type="checkbox"/> _0 | <input type="checkbox"/> _1 |
| 18. Ma consommation de nourriture a provoqué ou aggravé d'importants problèmes physiques.                                                                                                    | <input type="checkbox"/> _0 | <input type="checkbox"/> _1 |
| 19. J'ai continué à consommer les mêmes types d'aliments ou la même quantité de nourriture malgré l'existence de problèmes physiques et/ou psychologiques.                                   | <input type="checkbox"/> _0 | <input type="checkbox"/> _1 |
| 20. Au fil du temps, j'ai constaté que j'avais besoin de manger de plus en plus pour obtenir le même effet, qu'il s'agisse de la diminution d'émotions négatives ou d'un plus grand plaisir. | <input type="checkbox"/> _0 | <input type="checkbox"/> _1 |
| 21. J'ai l'impression que le fait de manger la même quantité de nourriture ne diminue pas mes émotions négatives ou n'augmente pas le plaisir que je peux ressentir comme par le passé.      | <input type="checkbox"/> _0 | <input type="checkbox"/> _1 |
| 22. Je veux réduire ou arrêter de manger certains types d'aliments.                                                                                                                          | <input type="checkbox"/> _0 | <input type="checkbox"/> _1 |
| 23. J'ai essayé de réduire ou d'arrêter de manger certains types d'aliments.                                                                                                                 | <input type="checkbox"/> _0 | <input type="checkbox"/> _1 |
| 24. J'ai réussi à arrêter ou à ne pas manger ce genre d'aliments.                                                                                                                            | <input type="checkbox"/> _0 | <input type="checkbox"/> _1 |

**Au cours de ces 12 derniers mois :**

|                                                                                                                                   | Une fois                    | 2 fois                      | 3 fois                      | 4 fois                      | 5 fois ou plus              |
|-----------------------------------------------------------------------------------------------------------------------------------|-----------------------------|-----------------------------|-----------------------------|-----------------------------|-----------------------------|
| 25. Au cours de la dernière année, combien de fois en tout avez-vous essayé de réduire ou d'arrêter de manger certains aliments ? | <input type="checkbox"/> _0 | <input type="checkbox"/> _1 | <input type="checkbox"/> _2 | <input type="checkbox"/> _3 | <input type="checkbox"/> _4 |

26. Merci d'encercler TOUS les aliments avec lesquels vous avez actuellement des difficultés.

|                  |                     |               |                       |
|------------------|---------------------|---------------|-----------------------|
| Crème glacée     | Chocolat            | Pommes        | Beignets              |
| Brocoli          | Paquets de biscuits | Gâteaux       | Pain blanc            |
| Les petits pains | Laitue              | Pâtes         | Fraises               |
| Riz              | Crackers            | Bretzels      | Frites                |
| Carottes         | Steak               | Bananes       | Bacon                 |
| Hamburgers       | Pizzas              | Soda          | Esquimau              |
| Bonbons          | Chips               | Cheeseburgers | Aucun de ces aliments |

27. Merci de lister ici quels sont les autres aliments avec lesquels vous avez des difficultés (merci de ne mentionner que les aliments n'étant pas déjà dans la liste ci-dessus)
